# Supplementary material
Source: PubMed Central journal article supplement (PMC2756554)
Supplement: mmc1.pdf [file mmc1.pdf]

## Supplemental Data

*AJHG*, Volume 85

### Heterozygous *NTF4* Mutations Impairing Neurotrophin-4 Signaling in Patients with Primary Open-Angle Glaucoma

Francesca Pasutto, Tomoya Matsumoto, Christian Y. Mardin, Heinrich Sticht, Johann H. Brandstätter, Karin Michels-Rautenstrauss, Nicole Weisschuh, Eugen Gramer, Wishal D. Ramdas, Leonieke M.E. van Koolwijk, Caroline C.W. Klaver, Johannes R Vingerling, Bernhard H.F. Weber, Friedrich E. Kruse, Bernd Rautenstrauss, Yves-Alain Barde, and André Reis

**Table S1. Primers Sequences Used for Mutation Detection of *NTF4* and RT-PCR Amplification Primers of the *NTF4* Transcript**

| Primer Name               | Sequence                | Product Size (bp) |
|---------------------------|-------------------------|-------------------|
| <b>Sequencing Primers</b> |                         |                   |
| NTF45_1AF                 | AGCGAGCAGGAGGAGGAG      | 379               |
| NTF45_1AR                 | TCTCCCTCAGACCCAGGAAT    |                   |
| NTF45_1BCF                | CAGGTAAGATCTCCACTCCTCCT | 350               |
| NTF45_1BCR                | CTTCAGACCCAGGAGTCCAT    |                   |
| NTF45_2F                  | ACTTGAAGAGGAACTCTGGGAAG | 412               |
| NTF45_2R                  | TCAAAACTGCCACTAAGGAGGTA |                   |
| NTF45_3p1F                | CTTCTTTCCCACTGAAGTTTTT  | 524               |
| NTF45_3p1R                | CACCTTCCTCAGCGTTATCAG   |                   |
| NTF45_3p2F                | CCCCGAGTAGTCCTGTCTAGG   | 544               |
| NTF45_3p2R                | CTCTCAGCATCCAGCTCTGTTAT |                   |
| NTF45_3p3F                | ATGGATTCGAATTGACACTGC   | 494               |
| NTF45_3p3R                | CATCTGCTTGCCTGTTCTAGTTT |                   |
| NTF45_3p4F                | CCAGTTTGGGAACTCATCAAATA | 537               |
| NTF45_3p4R                | GATCACTTCTCATTCAACCTTGC |                   |
| <b>RT-PCR Primers</b>     |                         |                   |
| NTF45_c1F                 | CGAGAGATGCTCCCTCTCC     | 847               |
| NTF45_c1R                 | TTATTACCCTCAAGTTGCTCCA  |                   |
